# Supplementary material for: EcoTILLING Reveals Natural Allelic Variations in Starch Synthesis Key Gene TaSSIV and Its Haplotypes Associated with Higher Thousand Grain Weight
Source: MDPI journal article supplement (doi:10.3390/genes10040307), 2019-04-18
Supplement: s1 [file s1]

**Table S2.** List of primers used for EcoTILLING of *TaSSIV A, B* and *D* sub genomes.

| Primer   | Sequence (5'- 3')          | Size | Temp |
|----------|----------------------------|------|------|
| SS4b-FA1 | TTTTCGTGTAGGTCCAGCAA       | 20   | 57   |
| SS4b-RA1 | CCTTTTATGAACCAATTCTCGC     | 22   |      |
| SS4b-FA2 | TTTCCATTTCTTGTGTGCTG       | 20   | 56   |
| SS4b-RA2 | AACACTCGGTTGGTTCAC TG      | 20   |      |
| SS4b-FA3 | CCCTTTGACATTTAACCTTCAG     | 22   | 56   |
| SS4b-RA3 | CCGATAAATGTGATGACAAACG     | 22   |      |
| SS4b-FB1 | TGCATAACCACTGAATTGCA       | 20   | 57   |
| SS4b-RB1 | TTAAGGCTACATCCATTCACAC     | 22   |      |
| SS4b-FB2 | GTGTGAATGGATGTAGCCTTA      | 21   | 52   |
| SS4b-RB2 | GCCAAAAAAGTCTACATCG        | 19   |      |
| SS4b-FB3 | TGGCTTCTTCATACTTTGATAG     | 22   | 57   |
| SS4b-RB3 | GCGCATACTACGATCTTGAGG      | 21   |      |
| SS4b-FD1 | GGTAGGAATGATACAGAACACC     | 22   | 57   |
| SS4b-RD1 | ACTAAAACCCACTTTGCGAC       | 20   |      |
| SS4b-FD2 | CTGCAAAAAATTGTCTAAAAGCTAC  | 25   | 58   |
| SS4b-RD3 | CATGCTTTGAAATTATCTACTTTTCG | 25   |      |
| SS4b-FD3 | ACCAGAAATTCAGGTGCGTT       | 20   | 60   |
| SS4b-RD3 | TGAGTCGTGTTGTGCCCCG        | 18   |      |

**Figure S1.** Specific primer for *TaSSIV-A* and *TaSSIV-B* with validation Chinese Spring nullisomic-tetrasomic lines.

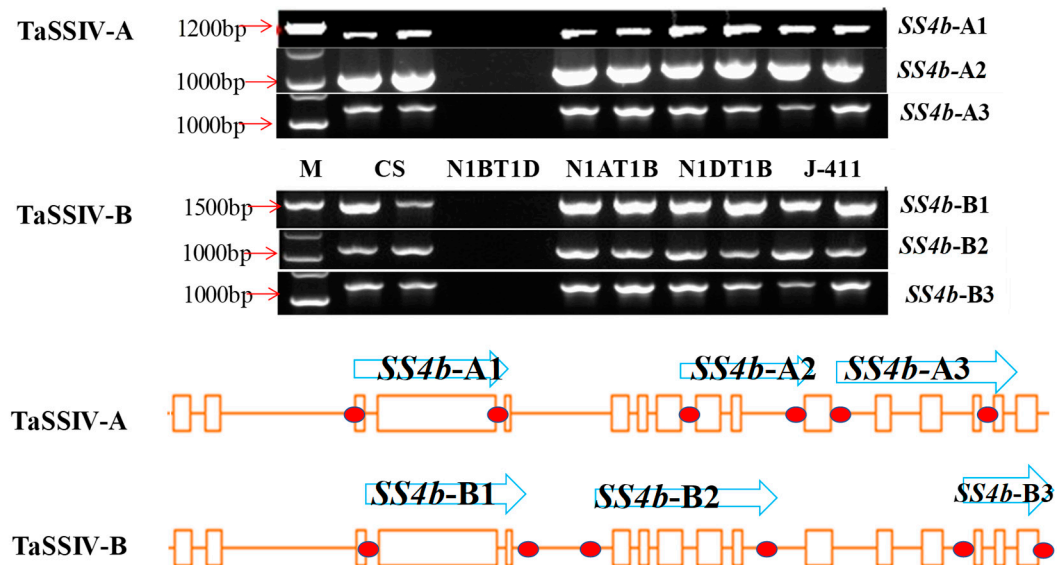

- a. Chinese Spring (CS), nullisomic-tetrasomic lines (N1AT1B, N1AT1D, N1BT1D and N1DT1B) and wild type (J411) amplified. b Diagram of *TaSSIV-A* and *TaSSIV-B* primers: orange arrowheads indicate exon regions; blue rectangles represent the location of each primer.

**Table S3.** KASP markers that are tightly linked to TaSSIV-A and TaSSIV-B and their primer sequences.

| Marker name        | Sequence (5'- 3')                                                                                                                       |
|--------------------|-----------------------------------------------------------------------------------------------------------------------------------------|
| <i>KASP-A1673T</i> | F: GAAGGTGACCAAGTTCATGCTCAAAAAGTCAAATTGGTAGAAGAAA<br>F: GAAGGTCGGAGTCAACGGATTCAAAAAGTCAAATTGGTAGAAGAAT<br>R: TGAGAATGCATTTTACAATTACATG  |
| <i>KASP-A2403C</i> | F: GAAGGTGACCAAGTTCATGCTAAGTTCTCTTGTTCTCTTGTTGATA<br>F: GAAGGTCGGAGTCAACGGATTAAAGTTCTCTTGTTCTCTTGTTGATC<br>R: CTTCTACCAATTTGACTTTTTGCTG |
| <i>KASP-C2436T</i> | F: GAAGGTGACCAAGTTCATGCTGAATTTACGATACTCTTAGCAAAC<br>F: GAAGGTCGGAGTCAACGGATTGAATTTACGATACTCTTAGCAAAT<br>R: CCAGTGATCTTTTCTCACTTTCCTC    |
| <i>KASP-C5952T</i> | F: GAAGGTGACCAAGTTCATGCTCCTCATGAACAGTTTATTTATCACC<br>F: GAAGGTCGGAGTCAACGGATTCCTCATGAACAGTTTATTTATCACT<br>R: AATACACCATTCAGACTCATGTTC   |
| <i>KASP-C1560T</i> | F: GAAGGTGACCAAGTTCATGCTTAAGCTTTCAAGTGAAGGGAATTC<br>F: GAAGGTCGGAGTCAACGGATTTAAGCTTTCAAGTGAAGGGAATTT<br>R: ATCAAACCTAATGCTAGTGGAGAG     |
| <i>KASP-C6107T</i> | F: GAAGGTGACCAAGTTCATGCTCATGAGATATGGTTCTGTGCCAATC<br>F: GAAGGTCGGAGTCAACGGATTCATGAGATATGGTTCTGTGCCAATT<br>R: CTGTCATTCAGCCCACCAGTTTTCC  |
